# Supplementary material
Source: PubMed Central journal article supplement (PMC3771820)
Supplement: NIHMS53607-supplement-supplement.pdf [file NIHMS53607-supplement-supplement.pdf]

## Supporting information

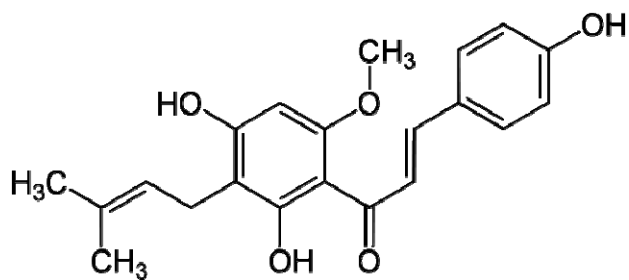

Figure S1. Chemical structure of xanthohumol.

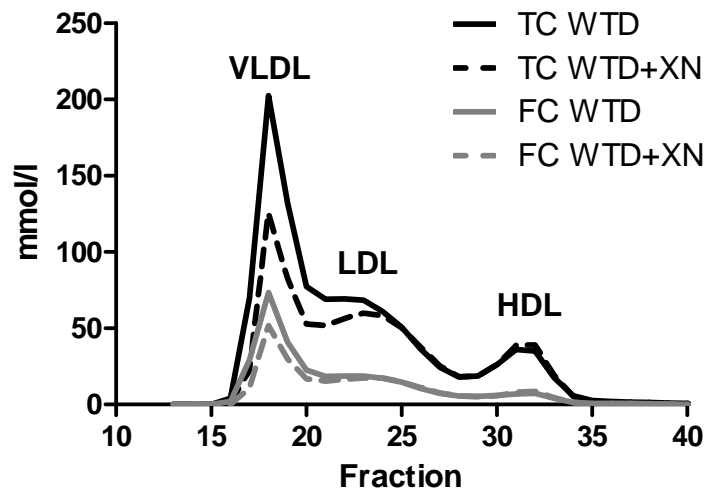

**Figure S2. Decreased cholesterol concentrations in VLDL fraction of XN-fed *Ldlr*<sup>-/-</sup> mice.** Lipoprotein profile of pooled plasma samples from overnight fasted *Ldlr*<sup>-/-</sup> mice (n=4) fed WTD or WTD ± XN for 4 weeks.

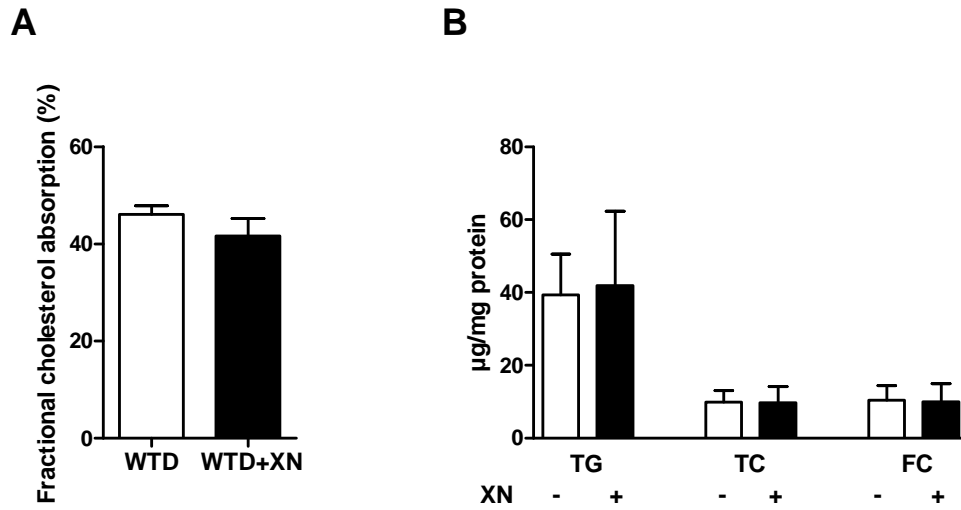

**Figure S3. Unchanged fractional cholesterol absorption.** (A) Fractional cholesterol absorption in *ApoE*<sup>-/-</sup> mice (n=5) fed WTD  $\pm$  XN for 4 weeks. (B) Lipid levels in jejunum of *ApoE*<sup>-/-</sup> mice (n=9) fed WTD  $\pm$  XN for 8 weeks.

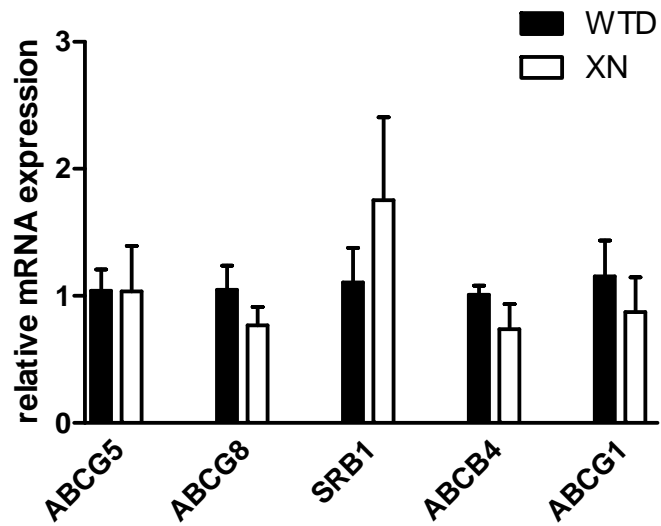

**Figure S4. Quantitative real-time PCR analysis of hepatic genes involved in cholesterol transport.** Female *ApoE*<sup>-/-</sup> mice were fed WTD ± XN for 8 weeks. Livers were excised and total RNA was isolated. Data are expressed as mean values (n=4) ± SD normalized to cyclophilin A.

**Table S1: Reduced plasma cholesterol concentrations in XN-fed *Ldlr*<sup>-/-</sup> mice.**

|          | WTD        | WTD+XN      |
|----------|------------|-------------|
| (mmol/l) | (n=4)      | (n=4)       |
| TC       | 13.2 ± 1.1 | 9.8 ± 0.6 * |
| FC       | 4.3 ± 0.3  | 3.3 ± 0.2 * |
| CE       | 8.9 ± 0.8  | 6.5 ± 0.5 * |
| TG       | 2.6 ± 0.1  | 2.3 ± 0.1   |

a) *Ldlr*<sup>-/-</sup> mice were fed WTD or WTD+XN for 4 weeks. Plasma was isolated from overnight fasted mice and TG, TC and FC concentrations were measured enzymatically. CE levels were calculated as CE = TC - FC.

b) Data are expressed as mean values (n=4) ± SD. \*p < 0.05.
